# Supplementary material for: Inter-comparison study of atmospheric 222 Rn and 222 Rn progeny monitors
Source: Copernicus journal article supplement (doi:10.5194/amt-2019-378), 2019-11-06
Supplement: Supplementary file 1 [file amt-2019-378-supplement.pdf]

Supporting Information for

## **Inter-comparison study of atmospheric $^{222}\text{Rn}$ and $^{222}\text{Rn}$ progeny monitors**

Claudia Grossi<sup>1,2</sup>, Olivier Llido<sup>3</sup>, Felix R. Vogel<sup>4</sup>, Victor Kazan<sup>3</sup>, Alessandro Capuana<sup>5</sup>, Scott D. Chambers<sup>6</sup>, Sylvester Werczynski<sup>6</sup>, Roger Curcoll<sup>7,8</sup>, Marc Delmotte<sup>3</sup>, Arturo Vargas<sup>1</sup>, Josep-Anton Morguí<sup>7,9</sup>, Ingeborg Levin<sup>5</sup>, Michel Ramonet<sup>3</sup>.

<sup>1</sup> Institut de Tècniques Energètiques (INTE), Universitat Politècnica de Catalunya (UPC), Barcelona, Spain;

<sup>2</sup> Physics Department, Universitat Politècnica de Catalunya (UPC), Barcelona, Spain;

<sup>3</sup> Laboratoire des Sciences du Climat et de l'Environnement, Université Paris-Saclay (LSCE/IPSL, CEA-CNRS-UVSQ), Gif-sur-Yvette, France;

<sup>4</sup> Climate Research Division, Environment and Climate Change Canada, Toronto, Canada;

<sup>5</sup> Institut für Umweltphysik (IUP), Heidelberg University, Heidelberg, Germany;

<sup>6</sup> Environmental Research, ANSTO, Lucas Heights, Australia;

<sup>7</sup> Institut de Ciència i Tecnologia Ambientals (ICTA), Universitat Autònoma de Barcelona (UAB), Cerdanyola del Vallès, Spain;

<sup>8</sup> Chemical Department, Universitat Politècnica de Catalunya (UPC), Barcelona, Spain;

<sup>9</sup> Departament Biologia Evolutiva, Ecologia i Ciències Ambientals, Universitat de Barcelona (UB), Barcelona, Spain.

*Correspondence to:* Claudia Grossi (claudia.grossi@upc.edu)

### **Contents of this file**

S1

S2

S3

S4

## Introduction

Here we show the plots of the linear regression fits calculated during the Phase I and II of our intercomparison study.

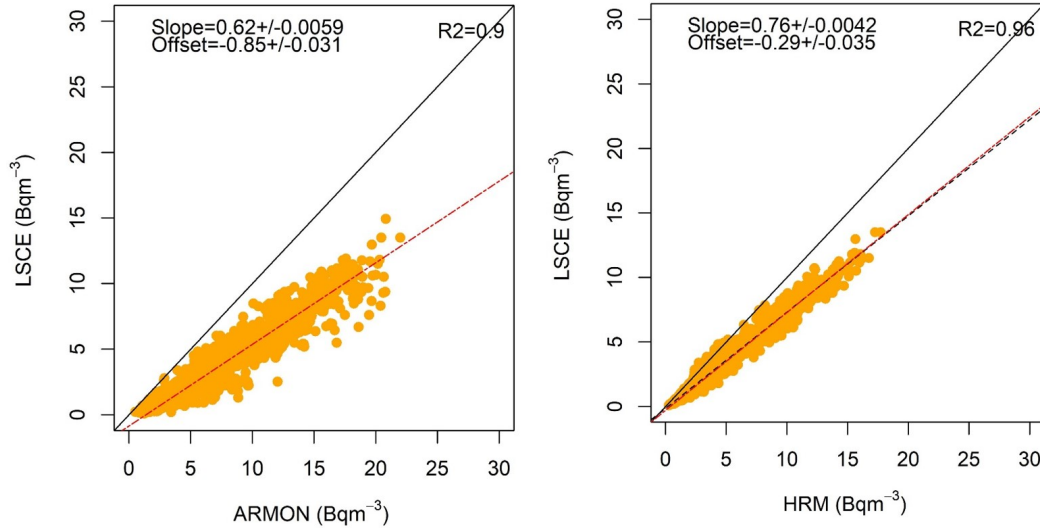

Figure S1. **Left panel:** Linear regression fits between the hourly atmospheric  $^{214}\text{Po}$  activity concentrations measured by the LSCE and the  $^{222}\text{Rn}$  activity concentrations measured by ARMON during the Phase I at the ODM site. **Right panel:** Linear regression fits between the hourly atmospheric  $^{214}\text{Po}$  activity concentrations measured by the LSCE and the HRM during the Phase I at the ODM site.

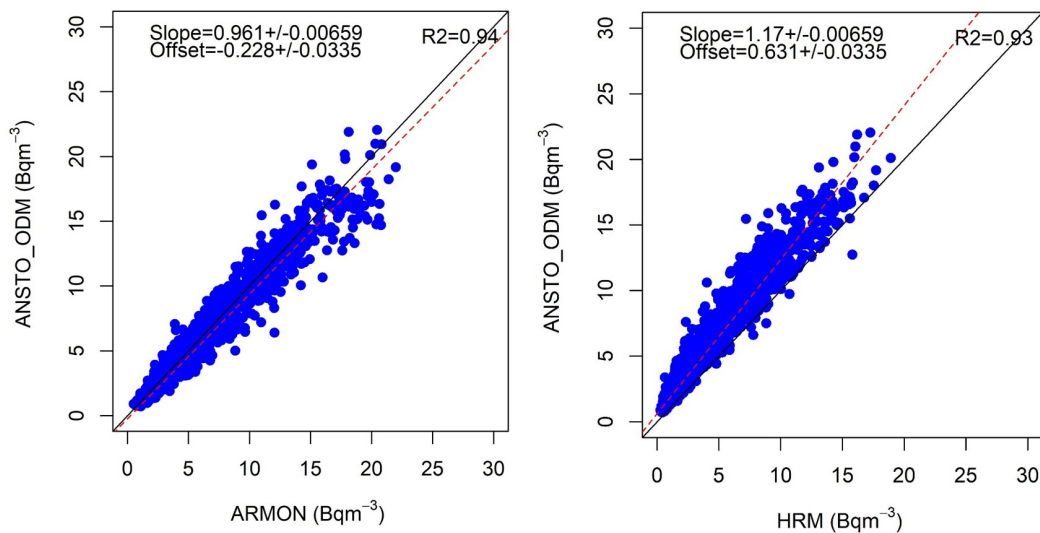

Figure S2. **Left panel:** Linear regression fits between the hourly atmospheric <sup>222</sup>Rn activity concentrations measured by the ANSTO\_ODM and by ARMON during the Phase I at the ODM site. **Right panel:** Linear regression fits between the hourly atmospheric <sup>222</sup>Rn activity concentrations measured by the ANSTO\_ODM and the hourly atmospheric <sup>214</sup>Po activity concentrations measured by the HRM during the Phase I at the ODM site.

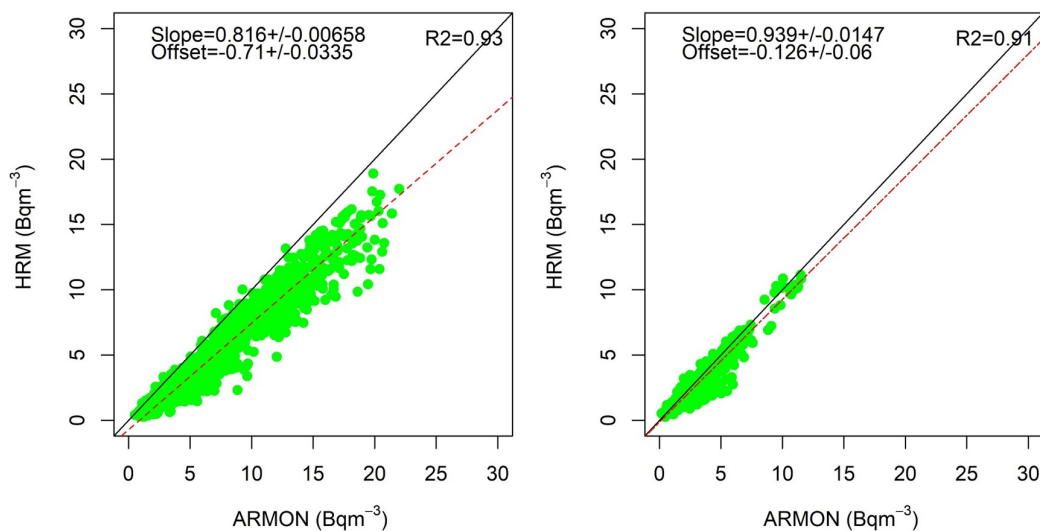

Figure S3. **Left panel:** Linear regression fits between the hourly atmospheric <sup>214</sup>Po activity concentrations measured by the HRM and the hourly atmospheric <sup>222</sup>Rn activity concentration

measured by the ARMON during the Phase I at the ODM site. **Right panel:** Linear regression fits between the hourly atmospheric  $^{214}\text{Po}$  activity concentrations measured by the HRM and the hourly atmospheric  $^{222}\text{Rn}$  activity concentration measured by the ARMON during the Phase II at the SAC site.

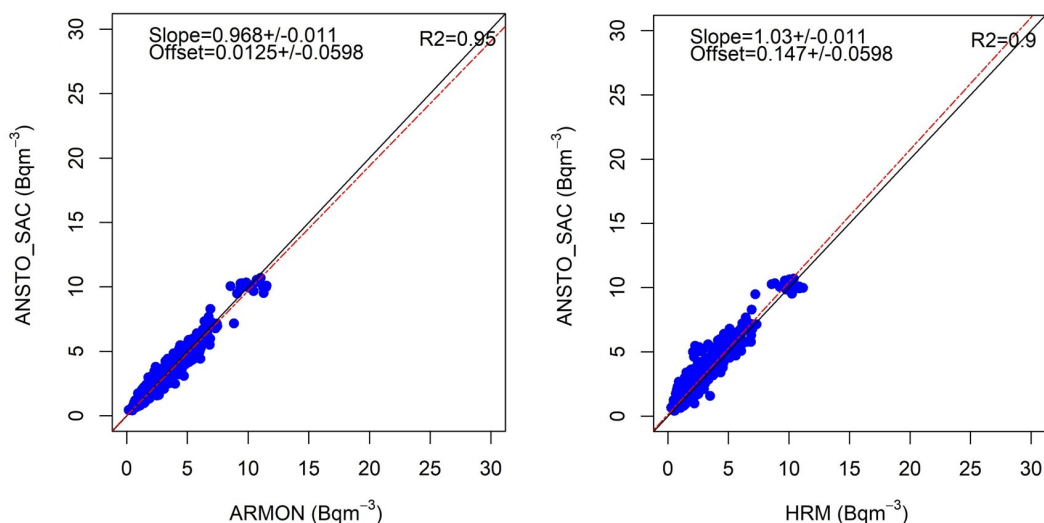

Figure S4. **Left panel:** Linear regression fits between the hourly atmospheric  $^{222}\text{Rn}$  activity concentrations measured by the ANSTO\_SAC and by ARMON during the Phase II at the SAC site. **Right panel:** Linear regression fits between the hourly atmospheric  $^{222}\text{Rn}$  activity concentrations measured by the ANSTO\_SAC and the hourly atmospheric  $^{214}\text{Po}$  activity concentrations measured by the HRM during the Phase II at the SAC site.
